# Supplementary material for: Trace gas and dynamic process monitoring by Raman spectroscopy in metal-coated hollow glass fibres
Source: Royal Society of Chemistry journal article supplement (doi:10.1039/c4ay02597k), 2015-01-01
Supplement: c4ay02597k2.pdf [file c4ay02597k2.pdf]

**Composition changes of hydrogen isotopologues during gas circulation and catalytic conversion – a time lapse movie**

Timothy M. James, Simone Rupp and Helmut H. Telle

---

**Video legend:**

Sequence of spectra, recorded in our capillary Raman system in near real time, following the stepwise injection of H<sub>2</sub>/D<sub>2</sub> and the formation of HD during circulation through a platinum-based catalyst.

**Tags:**

hydrogen isotopologues, catalytic conversion, Raman spectroscopy, metal-lined capillary, quantitative analysis, real time monitoring
